# Supplementary material for: Higher proportion of low-virulence anaerobic bacterial infection in young patients with intervertebral disc herniation
Source: PubMed Central journal article supplement — Exp Ther Med. 2019 Aug 16;18(4):3085–9. doi: 10.3892/etm.2019.7910 (PMC6755454; doi:10.3892/etm.2019.7910), 2019-08-16
Supplement: Supplementary_Data.pdf [file Supplementary_Data.pdf]

Figure S1. The distribution of bacterial-positive and bacterial bacterial-negative subjects by age.

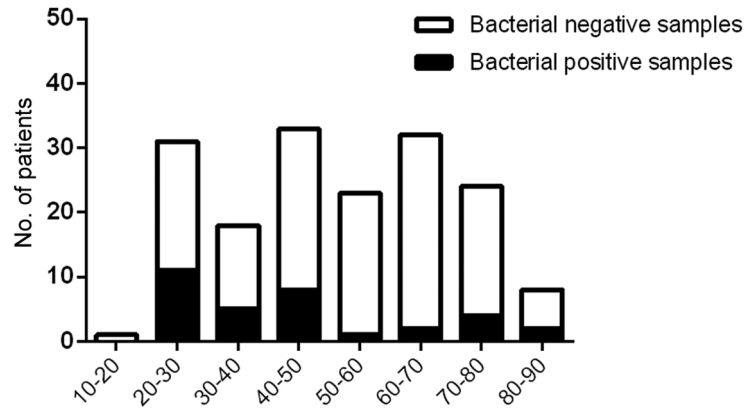

Table SI. Bacterial information in potential contaminated samples

---

| Number | IVDs            | Corresponding control samples |
|--------|-----------------|-------------------------------|
| 1      | <i>P. acnes</i> | <i>P. acnes</i>               |
| 2      | <i>P. acnes</i> | <i>P. acnes</i> + CNS         |
| 3      | <i>P. acnes</i> | CNS                           |
| 4      | <i>P. acnes</i> | <i>P. acnes</i> + CNS         |
| 5      | CNS             | CNS                           |
| 6      | CNS             | CNS                           |

---

Control samples were ligaments and muscle specimens. CNS, coagulase negative *Staphylococcus*; *P. acnes*, *Propionibacterium acnes*; IVD, intervertebral disc.

---
